# Supplementary material for: Effect of Ni-MOF Derivatives on the Electrochemical Corrosion Behavior of Sn-0.7Cu Solders
Source: MDPI journal article supplement (doi:10.3390/met12071172), 2022-07-10
Supplement: s1 [file s1]

# Effect of Ni-MOF derivatives on the electrochemical corrosion behavior of Sn-0.7Cu solders

Guoge Lu <sup>1</sup>, Bo Lin <sup>1</sup>, Zhan Gao <sup>1</sup>, Yingxin Li <sup>1</sup> and Fuxiang Wei <sup>1,2,\*</sup>

<sup>1</sup> School of Materials and physics, China University of Mining & Technology, Xuzhou 221116, PR China; 17826263672@163.com (G.L.); linbol1996@163.com (B.L.); gaozhancumt@163.com (Z.G.); li-yingxin199803@163.com (Y.L.)

<sup>2</sup> Jiangsu Province Engineering Laboratory of High Efficient Energy Storage Technology and Equipments, China University of Mining & Technology, Xuzhou, PR China

\* Correspondence: weifuxiang2001@163.com

**Table S1.** Corrosion parameters of Sn-0.7Cu-xNi@C (x=0, 0.04, 0.08, 0.12 Wt.%) composite solder.

| Composite solder        | E <sub>1</sub> (V) | E <sub>2</sub> (V) | E <sub>3</sub> (V) | Error (%) | i <sub>1</sub> (A/cm <sup>2</sup> ) | i <sub>2</sub> (A/cm <sup>2</sup> ) | i <sub>3</sub> (A/cm <sup>2</sup> ) | Error (%) |
|-------------------------|--------------------|--------------------|--------------------|-----------|-------------------------------------|-------------------------------------|-------------------------------------|-----------|
| Sn-0.7Cu                | -1.003             | -1.014             | -1.006             | 0.43%     | $4.16 \times 10^{-5}$               | $4.28 \times 10^{-5}$               | $4.19 \times 10^{-5}$               | 1.11%     |
| Sn-0.7Cu-0.04 Wt.% Ni@C | -0.976             | -0.980             | -0.987             | 0.41%     | $3.92 \times 10^{-5}$               | $3.96 \times 10^{-5}$               | $4.03 \times 10^{-5}$               | 1.01%     |
| Sn-0.7Cu-0.08 Wt.% Ni@C | -0.941             | -0.930             | -0.931             | 0.50%     | $1.38 \times 10^{-5}$               | $1.33 \times 10^{-5}$               | $1.34 \times 10^{-5}$               | 1.48%     |
| Sn-0.7Cu-0.12 Wt.% Ni@C | -0.977             | -0.985             | -0.984             | 0.34%     | $1.60 \times 10^{-5}$               | $1.66 \times 10^{-5}$               | $1.66 \times 10^{-5}$               | 1.62%     |

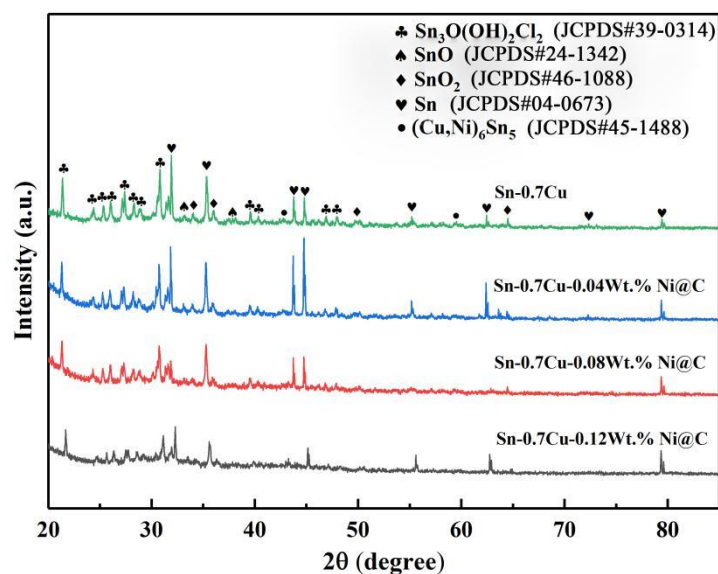

**Figure S1.** XRD pattern of Sn-0.7Cu-xNi@C (x=0, 0.04, 0.08, 0.12 Wt.%) solder after electrochemical corrosion.
